# Supplementary material
Source: Springer Nature journal article supplement (http://www.springermedizin.de/resource/supplementary/13014_2013_1056_MOESM1_ESM.pdf/9635210)
Supplement: MOESM1 [file 9635210]

93/42/EEC amended by 2007/47/EC  
Medical Device Directive

requires

requires

requires

Process Standards

EN 62304  
Software Life-Cycle

IEC/TR 80002-1  
Software Risk Management

Management Standards

EN ISO 13485  
Quality Management

EN ISO 14971  
Risk Management

EN 62366  
Usability Engineering

requires

requires

affects

affects

affects

Development and Maintenance  
of Safe and Reliable Medical Software
